# Supplementary material
Source: HighWire-hosted journal article supplement (https://bmjleader.bmj.com/highwire/filestream/1645/field_highwire_adjunct_files/0/leader-2020-000224supp001_data_supplement.pdf)
Supplement: leader-2020-000224supp001_data_supplement.pdf [file leader-2020-000224supp001_data_supplement.pdf]

## Supplementary file 1. Search strategy- databases

| Database                                                                                                                                                                | Search strategy (2017 - 2019)                                                                                                                                                                                                                                                                                                                                                                                                                                   | Results   | Included papers after screening      | Included papers after full-text reading                                                                                                             |
|-------------------------------------------------------------------------------------------------------------------------------------------------------------------------|-----------------------------------------------------------------------------------------------------------------------------------------------------------------------------------------------------------------------------------------------------------------------------------------------------------------------------------------------------------------------------------------------------------------------------------------------------------------|-----------|--------------------------------------|-----------------------------------------------------------------------------------------------------------------------------------------------------|
| Web of Science                                                                                                                                                          | TS= (artificial intelligence OR technological change OR robot* OR informatic* OR ehealth OR machine learning)<br>AND<br>SU= (Medical Informatics OR Health Care Sciences & Services OR Sociology OR Business & Economics OR Behavioral Sciences OR Robotics)<br>AND<br>TS= (professional boundaries OR skill shifts OR coordination OR collaboration OR collaborat* OR teamwork OR teamwork processess)<br>AND<br>TS= (health professional*)<br>Filter: Article | 89 papers | 17                                   | Morland & Pettersen 2018<br><br>Björkquist, C., Forss, M., & Samuelsen, F. (2018).<br><br>Swinkels et al., 2018<br><br>Tintorer, D.L., et al., 2018 |
| EBSCOhost                                                                                                                                                               | SU healthcare OR TI health* OR AB health                                                                                                                                                                                                                                                                                                                                                                                                                        | 1,419     | 26                                   | Randell et al., 2019.                                                                                                                               |
| Business Source Complete; eBook Collection (EBSCOhost); PsycARTICLES; Psychology and Behavioral Sciences Collection; Regional Business News; Humanities Source Ultimate | AND<br>SU robot* OR AB robot* OR TI robot* OR SU artificial intelligence OR AB artificial intelligence OR TI artificial intelligence OR SU technolog* OR AB technolog* OR TI technolog*<br>AND<br>AB team* OR TI team* OR AB teamwork* OR TI teamwork* OR AB collabor* OR TI collabor* OR AB cooperat* OR TI cooperat* OR AB coordinat* OR TI coordinat* OR AB network* OR TI network*                                                                          | 1,276*    | *After removing duplicates (Endnote) |                                                                                                                                                     |
